# Supplementary material for: The pathogenesis of H7N8 low and highly pathogenic avian influenza viruses from the United States 2016 outbreak in chickens, turkeys and mallards
Source: PubMed Central journal article supplement (PMC5421793; doi:10.1371/journal.pone.0177265), 2017-05-08
Supplement: pone.0177265.s004.pdf [file pone.0177265.s004.pdf]

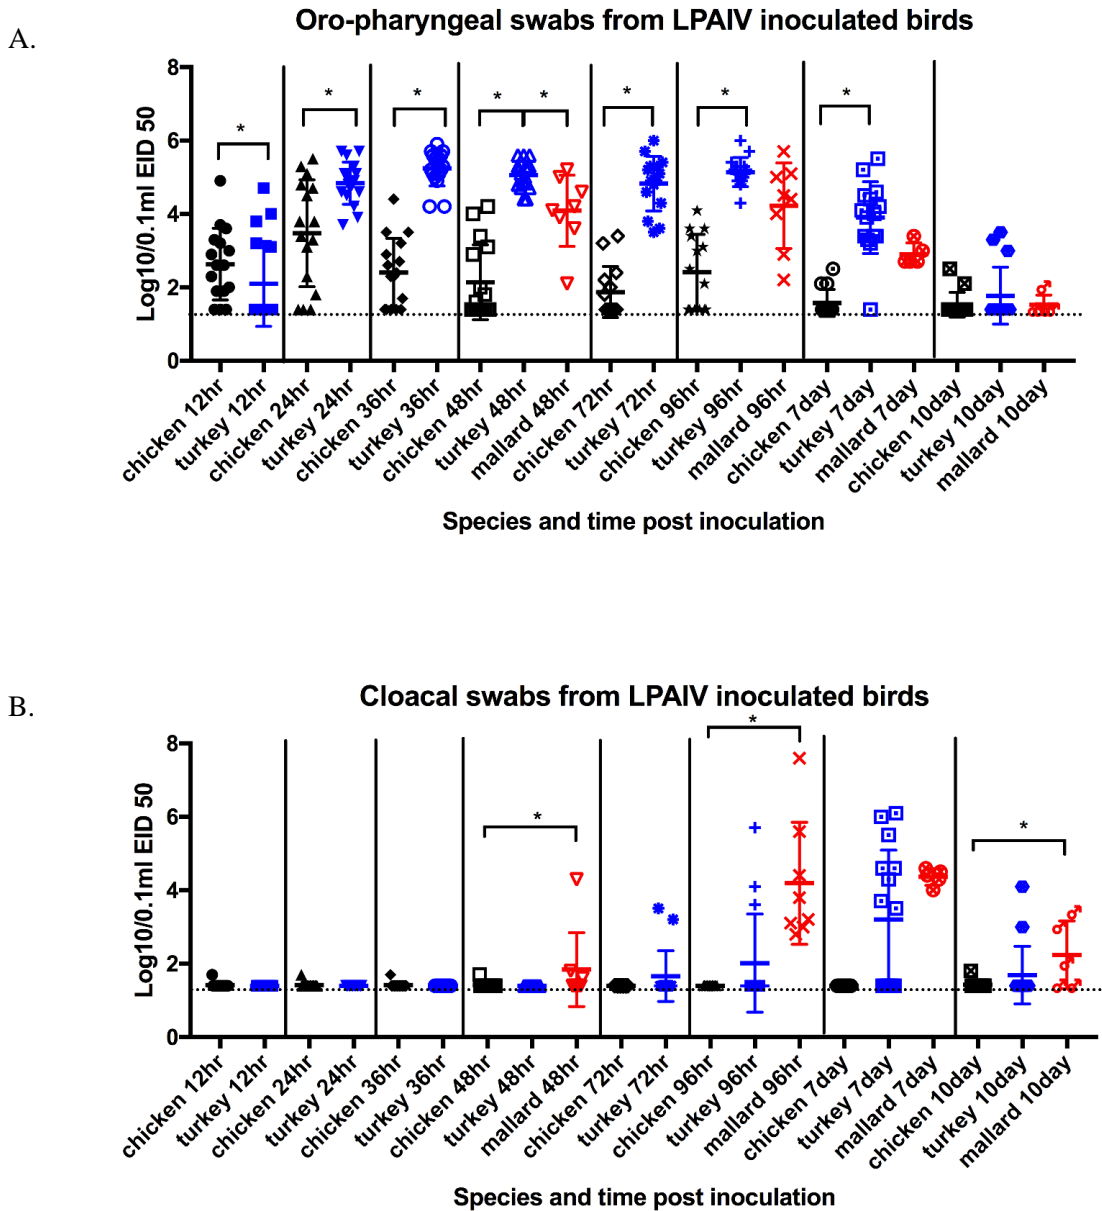

**Supplemental Figure 4.** Virus shed detected by qRRT-PCR from 3 week-old chickens (shown in black), 3 week-old turkeys (shown in blue) and 2 week-old mallards (shown in red) directly inoculated with  $10^6$  50% egg infectious doses per bird of H7N8 low pathogenic avian influenza virus by time post inoculation: A) Oro-pharyngeal swabs; B) Cloacal swabs. Bars represent mean and standard deviation; a dotted line represents the approximate limit of detection; samples where virus was not detected are shown at the limit of detection. Brackets with an asterisk denote statistical significance at a p value of  $\leq 0.05$  between the bracketed groups.
